# Supplementary material for: Assessment of Stress Caused by Environmental Changes for Improving the Welfare of Laboratory Beagle Dogs
Source: MDPI journal article supplement (doi:10.3390/ani13061095), 2023-03-19
Supplement: s1 [file s1]

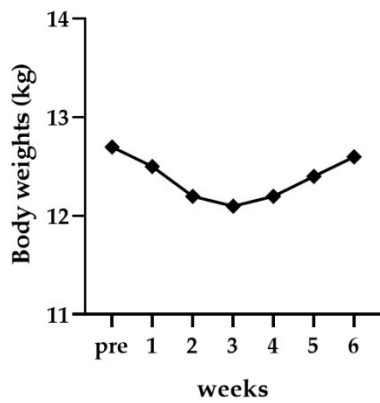

(a)

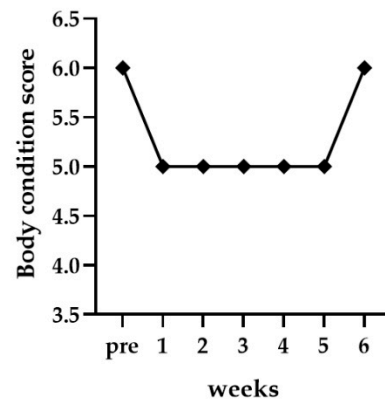

(b)

**Supplementary Figure S1.** Body weights and body condition scores (BCS) in separated dog. Change of body weights (a) and BCS (b) at 1-week intervals, including before environmental change with placing them into the cages (pre), for a total of 6 weeks in separated dog.

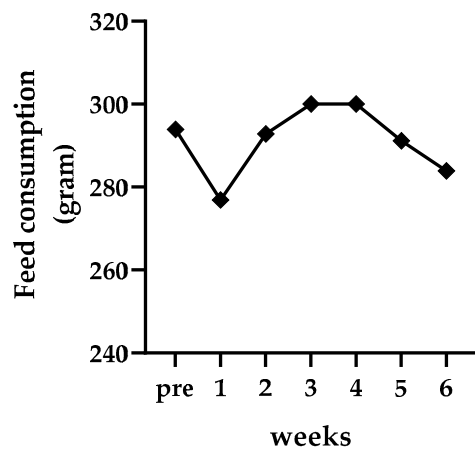

**Supplementary Figure S2.** Feed consumption in separated dog. Feed consumption at 1-week intervals, including before environmental change with placing them into the cages (pre), for a total of 6 weeks in separated dog.

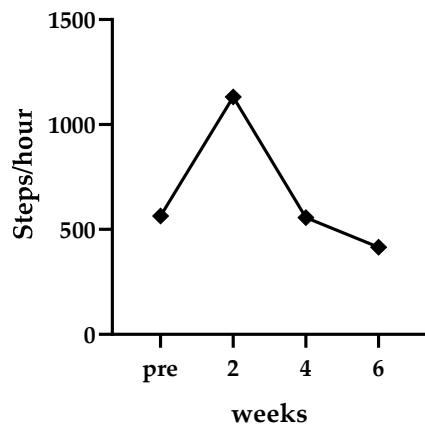

**Supplementary Figure S3.** Steps per hour in separated dog. Steps per hour measurement at 2-week intervals, including before environmental change with placing them into the cages (pre), for a total of 6 weeks in separated dog.

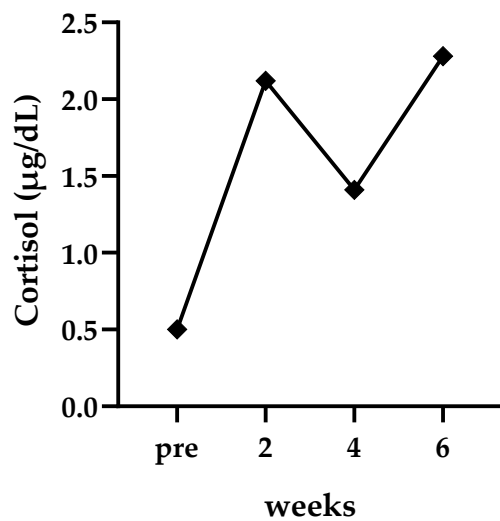

**Supplementary Figure S4.** Cortisol level in separated dog. Change of cortisol level in collected serum at 2-week intervals, including before environmental change with placing them into the cages (pre), for a total of 6 weeks in separated dog.

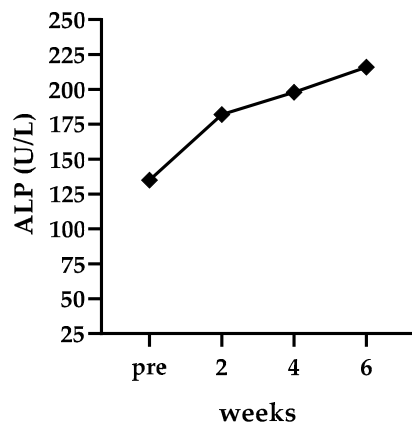

**Supplementary Figure S5.** Alkaline phosphatase (ALP) activity in separated dog. Change of ALP activity at 2-week intervals, including before environmental change with placing them into the cages (pre), for a total of 6 weeks in separated dog.
